# Supplementary material for: A biocompatible β-cyclodextrin inclusion complex containing natural extracts: a promising antibiofilm agent
Source: Royal Society of Chemistry journal article supplement (doi:10.1039/d4na00916a), 2025-01-01
Supplement: d4na00916a1.pdf [file d4na00916a1.pdf]

## **A Biocompatible $\beta$ -Cyclodextrin Inclusion Complex Containing Natural Extracts: A Promising Antibiofilm Agent**

Obaydah Abd Alkader Alabrahim<sup>1</sup>, Mostafa Fytory<sup>1,2</sup>, Ahmed M. Abou-Shanab<sup>3</sup>, Jude Lababidi<sup>1</sup>, Wolfgang Fritzsche<sup>4</sup>, Nagwa El-Badri<sup>3\*</sup>, Hassan Mohamed El-Said Azzazy<sup>1,4\*</sup>

<sup>1</sup>Department of Chemistry, School of Sciences & Engineering, The American University in Cairo, AUC Avenue, P.O. Box 74, New Cairo 11835, Egypt.

<sup>2</sup>Material Science and Nanotechnology Department, Faculty of Postgraduate Studies for Advanced Sciences (PSAS), Beni-Suef University, 62511, Beni-Suef.

<sup>3</sup>Center of Excellence for Stem Cells and Regenerative Medicine, Zewail City of Science and Technology, Giza, 12578, Egypt.

<sup>4</sup>Department of Nanobiophotonics, Leibniz Institute of Photonic Technology, Jena, Germany.

### **\*Corresponding authors:**

#### **Distinguished University Prof. Hassan M. E. Azzazy**

Department of Chemistry, School of Sciences & Engineering, The American University in Cairo, AUC Avenue, P.O. Box 74, New Cairo 11835, Egypt.

Tel: 00 202 2615 2559

Email: [hazzazy@aucegypt.edu](mailto:hazzazy@aucegypt.edu)

#### **Prof. Nagwa El-Badri**

Center of Excellence for Stem Cells and Regenerative Medicine, Zewail City of Science and Technology, Giza, 12578, Egypt

Email: [nelbadri@zewailcity.edu.eg](mailto:nelbadri@zewailcity.edu.eg)

## Table of contents:

**Figure S1.** SEM images of (a)  $\beta$ CD and (b) BOS- $\beta$ CD inclusion complex. The  $\beta$ CD field demonstrated large ovoid crystals alongside rectangular particles, whereas the particles of BOS- $\beta$ CD inclusion complex were presented with significant reduction in size and substantial morphological alterations developing several aggregates as well. These observations suggest the potential complexation formation of BOS- $\beta$ CD inclusion complex, possibly involving an amorphous product interacting with other components in the established complex.

**Figure S2.** FTIR spectra for BOS,  $\beta$ CD, and BOS- $\beta$ CD inclusion complex.

**Figure S3.**  $^1\text{H}$  NMR spectrum and stacked H1 Sub-spectra of BOS EO.

**Figure S4.**  $^1\text{H}$  NMR spectrum and stacked H1 Sub-spectra of  $\beta$ CD.

**Figure S5.**  $^1\text{H}$  NMR spectrum and stacked H1 Sub-spectra of BOS- $\beta$ CD.

**Supplementary Table 1.** Chemical shifts ( $\delta$ ) for  $\beta$ CD and BOS- $\beta$ CD and differences in chemical shift ( $\Delta\delta$ )

**Figure S6.** Microdilution assays for MICs determination of BOS EO & BOS- $\beta$ CD complex (Alamar Blue).

**Figure S7I.** Assay of Biofilm formation prevention against *S. aureus*.

**Figure S7II.** Assay of Biofilm formation prevention against *P. putida*.

**Figure S7III.** Assay of Biofilm formation prevention against *E. coli*.

**Figure S7IV.** Assay of Biofilm formation prevention against *B. subtilis*.

**Figure S8I.** Assay of established biofilm disruption against *S. aureus*.

**Figure S8II.** Assay of established biofilm disruption against *P. putida*.

**Figure S8III.** Assay of established biofilm disruption against *E. coli*.

**Figure S8IV.** Assay of established biofilm disruption against *B. subtilis*.

### Supplementary Figure S1.

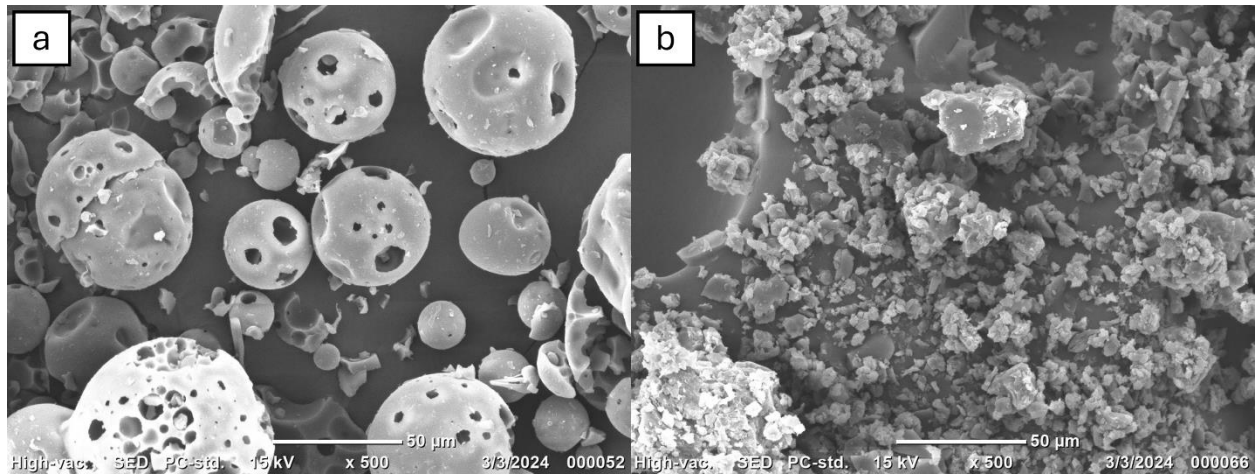

**Figure S1.** SEM images of (a)  $\beta$ CD and (b) BOS- $\beta$ CD inclusion complex. The  $\beta$ CD field demonstrated large ovoid crystals alongside rectangular particles, whereas the particles of BOS- $\beta$ CD inclusion complex were presented with significant reduction in size and substantial morphological alterations developing several aggregates as well. These observations suggest the potential complexation formation of BOS- $\beta$ CD inclusion complex, possibly involving an amorphous product interacting with other components in the established complex.

## Supplementary Figure S2.

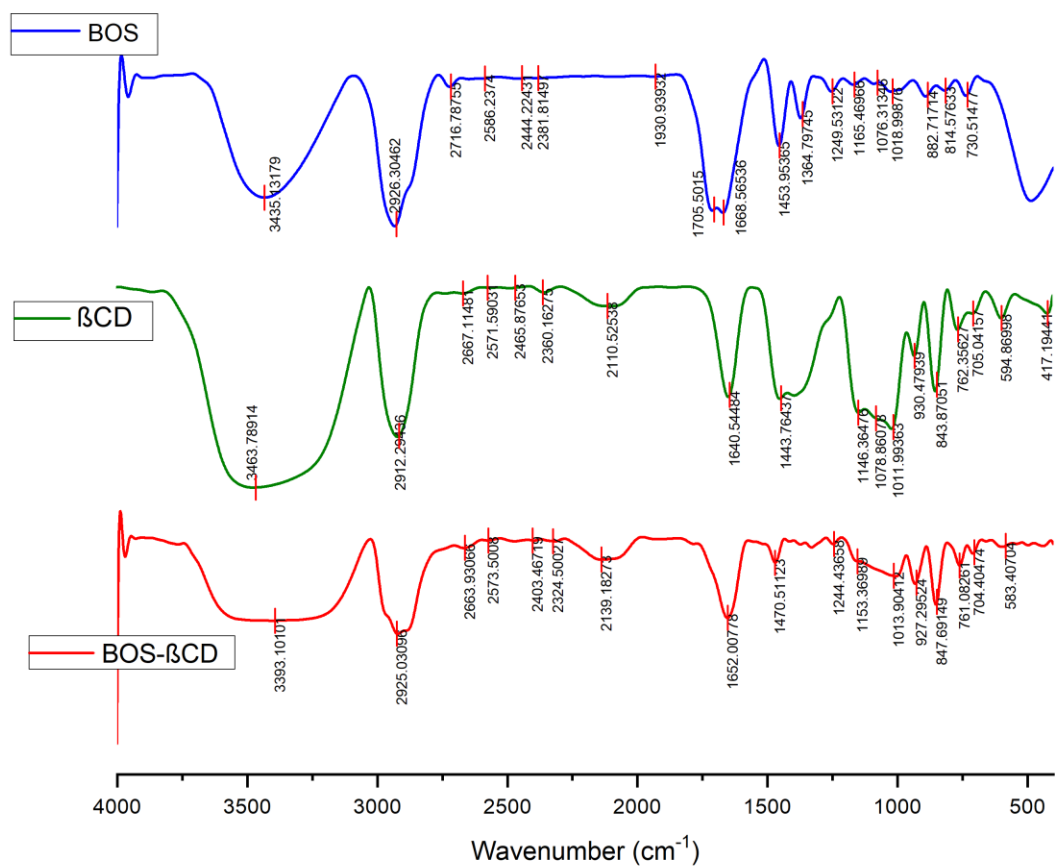

**Figure S2.** FTIR spectra for BOS,  $\beta$ CD, and BOS- $\beta$ CD inclusion complex.

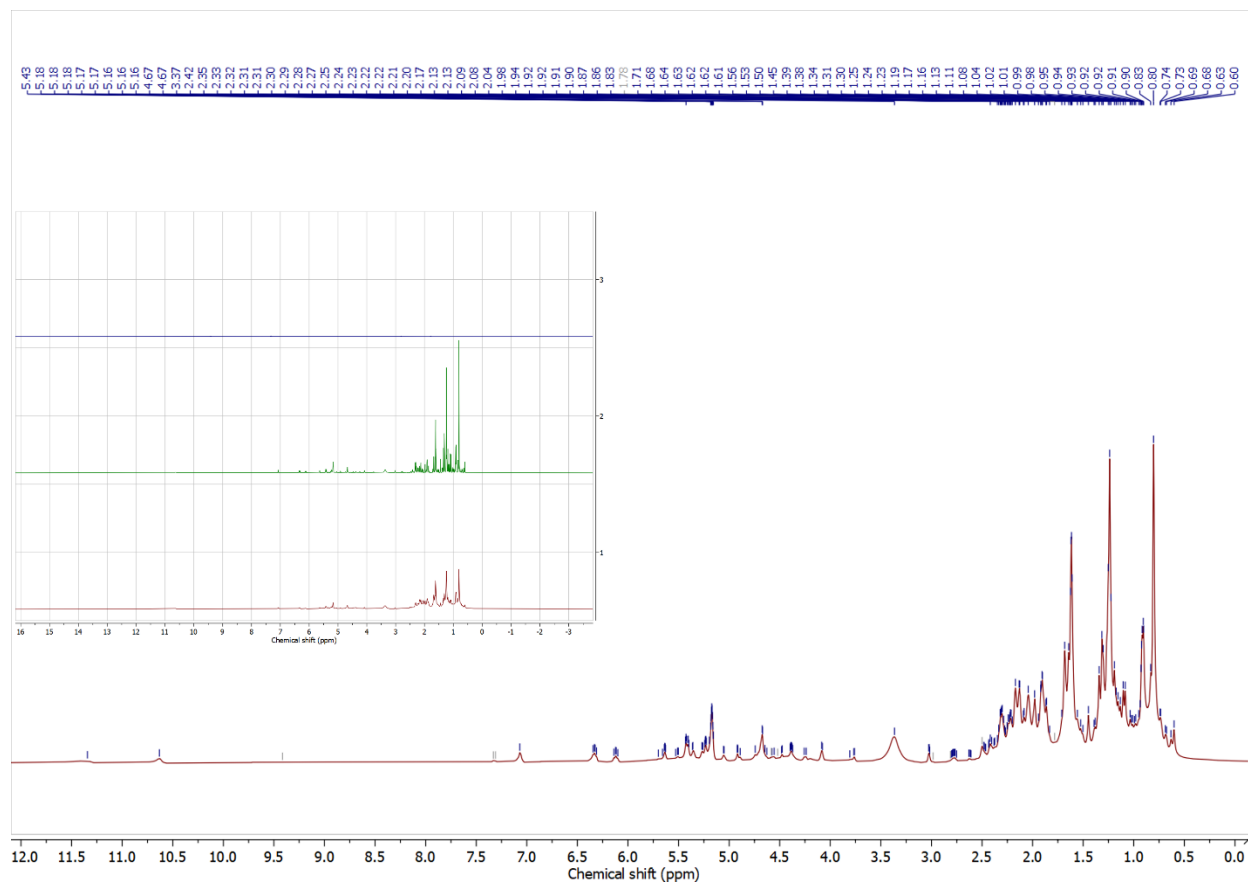

**Figure S3.**  $^1\text{H}$  NMR spectrum and stacked H1 Sub-spectra of BOS EO.

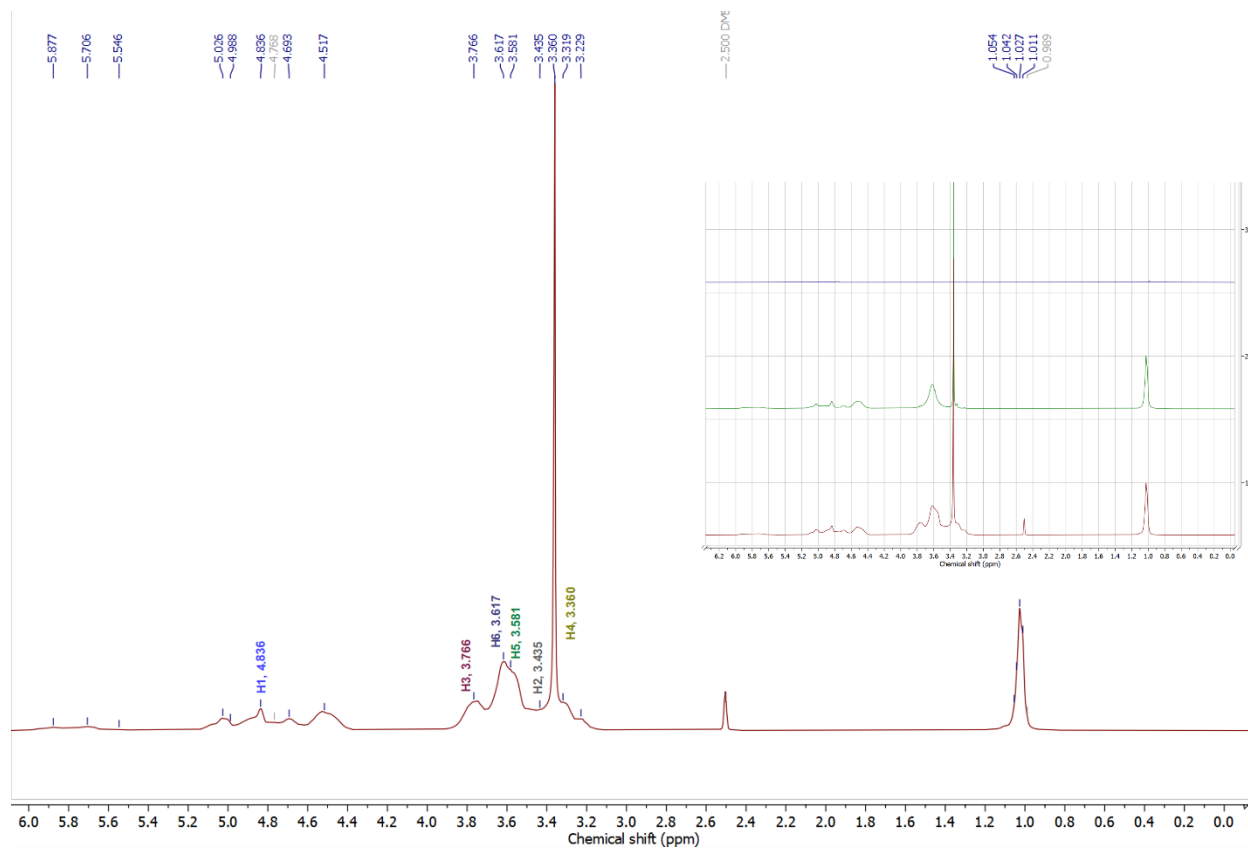

**Figure S4.**  $^1\text{H}$  NMR spectrum and stacked H1 Sub-spectra of  $\beta\text{CD}$ .

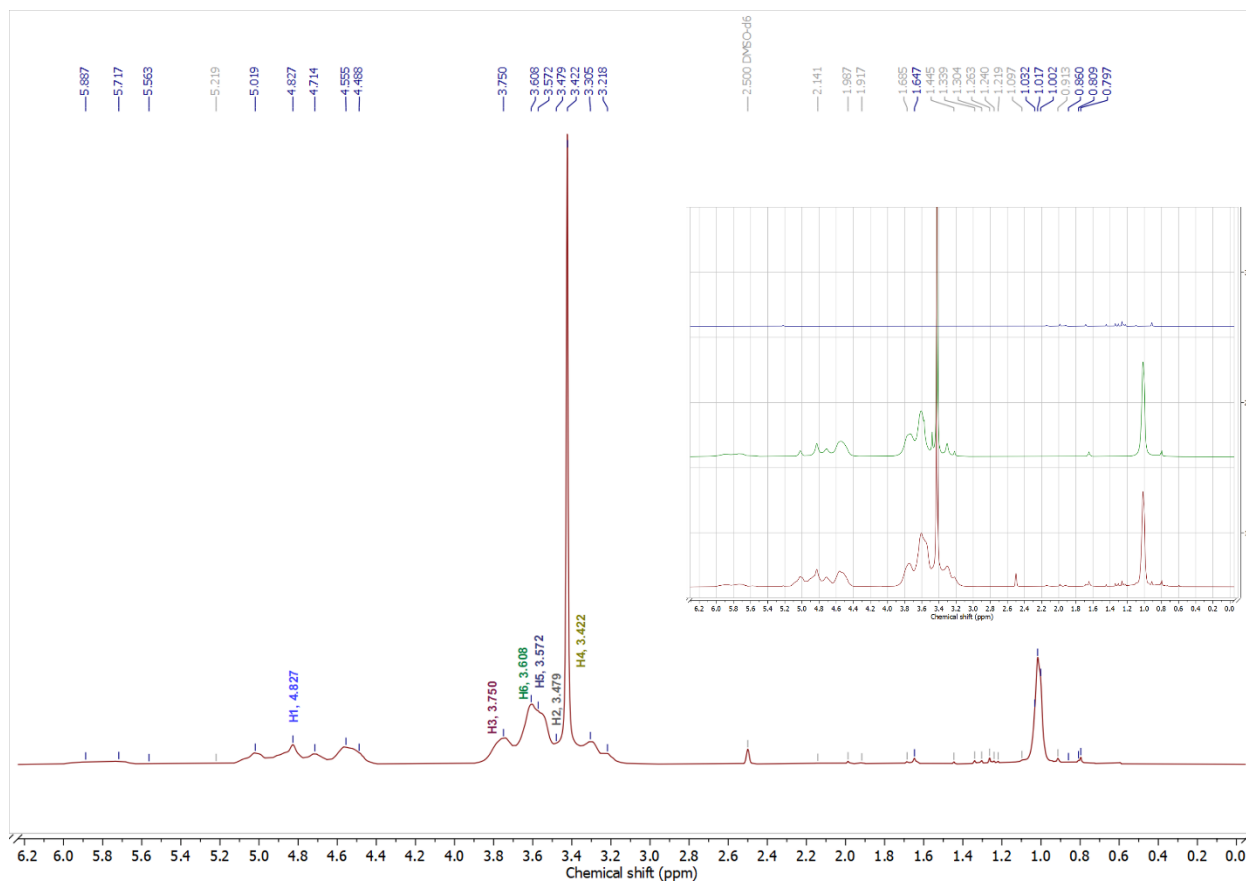

**Figure S5.**  $^1\text{H}$  NMR spectrum and stacked H1 Sub-spectra of BOS- $\beta$ -CD.

**Supplementary Table 1.** Chemical shifts ( $\delta$ ) for  $\beta$ CD and BOS- $\beta$ CD and differences in chemical shift ( $\Delta\delta$ )

| Proton no. | $\beta$ CD ( $\delta$ /ppm) | BOS- $\beta$ CD ( $\delta$ /ppm) | $\Delta\delta$ BOS- $\beta$ CD/ $\beta$ CD ( $\Delta\delta$ /ppm) |
|------------|-----------------------------|----------------------------------|-------------------------------------------------------------------|
| H1         | 4.836                       | 4.827                            | 0.009                                                             |
| H2         | 3.435                       | 3.479                            | -0.044                                                            |
| H3         | 3.766                       | 3.750                            | 0.016                                                             |
| H4         | 3.360                       | 3.422                            | -0.062                                                            |
| H5         | 3.581                       | 3.572                            | 0.009                                                             |
| H6         | 3.617                       | 3.608                            | 0.009                                                             |



Supplementary Figure S6.

**BOS EO & BOS-βCD complex**  
**Microdilution assays for MICs determination -Alamar Blue**

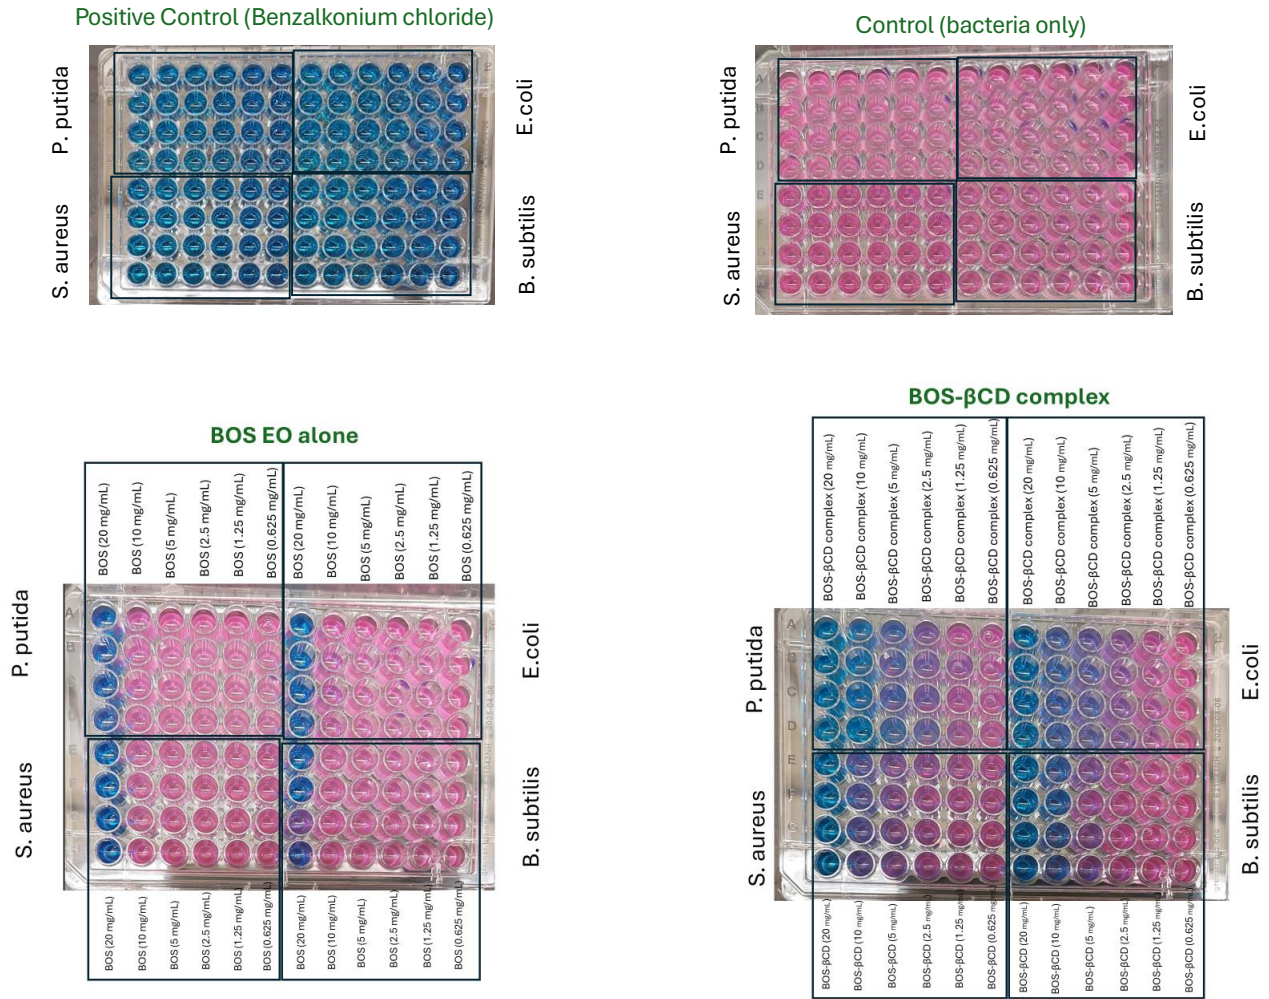

**Figure S6.** Microdilution assays for MICs determination of BOS EO & BOS-βCD complex (Alamar Blue).

Supplementary Figure S7I.

**Biofilm formation prevention-  
*S. aureus***

| Well | 1     | 2     | 3     | 4     | 5     | 6     | 7     | 8     | 9     | 10    | 11 | 12 |
|------|-------|-------|-------|-------|-------|-------|-------|-------|-------|-------|----|----|
| A    | 0.297 | 5.268 | 0.441 | 2.924 | 1.054 | 0.339 | 0.370 | 0.563 | 1.001 | 0.911 |    |    |
| B    | 0.431 | 2.647 | 0.177 | 1.922 | 1.348 | 0.578 | 0.383 | 0.822 | 0.720 | 1.187 |    |    |
| C    | 0.434 | 5.609 | 0.207 | 1.853 | 0.482 | 0.309 | 0.387 | 0.436 | 0.532 | 0.901 |    |    |
| D    | 0.395 | 2.969 | 0.235 | 3.863 | 0.768 | 0.276 | 0.354 | 0.508 | 0.857 | 2.246 |    |    |
| E    | 0.482 | 2.877 | 0.089 | 1.781 | 0.890 | 0.264 | 0.269 | 0.499 | 0.461 | 2.702 |    |    |

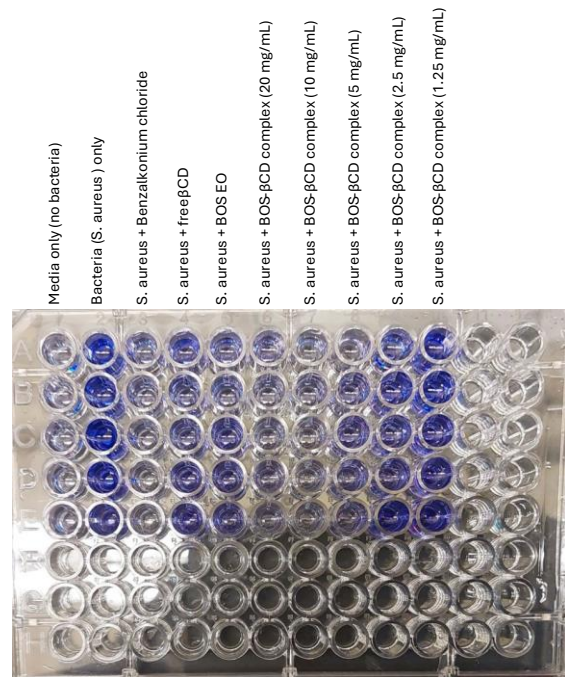

**Figure S7I.** Assay of Biofilm formation prevention against *S. aureus*.

Supplementary Figure S7II.

**Biofilm formation prevention-  
*P. Putida***

|   | 1     | 2     | 3     | 4     | 5     | 6     | 7     | 8     | 9     | 10    |
|---|-------|-------|-------|-------|-------|-------|-------|-------|-------|-------|
| A | 0.254 | 2.170 | 0.529 | 1.954 | 0.750 | 1.143 | 0.203 | 0.376 | 1.643 | 1.081 |
| B | 0.358 | 3.577 | 0.374 | 3.848 | 0.193 | 0.298 | 0.489 | 0.308 | 1.581 | 2.819 |
| C | 0.311 | 3.967 | 0.060 | 2.309 | 0.566 | 0.159 | 0.345 | 2.791 | 1.570 | 2.638 |
| D | 0.158 | 3.897 | 0.468 | 2.099 | 0.831 | 0.501 | 0.293 | 1.169 | 0.585 | 2.224 |
| E | 0.274 | 4.784 | 0.253 | 0.793 | 1.231 | 0.425 | 0.220 | 0.632 | 1.851 | 2.177 |

- Media only (no bacteria)
- Bacteria (*P. putida*) only
- P. putida* + Benzalkonium chloride
- P. putida* + free $\beta$ CD
- P. putida* + BOS EO
- P. putida* + BOS: $\beta$ CD complex (10 mg/mL)
- P. putida* + BOS: $\beta$ CD complex (5 mg/mL)
- P. putida* + BOS: $\beta$ CD complex (2.5 mg/mL)
- P. putida* + BOS: $\beta$ CD complex (1.25 mg/mL)
- P. putida* + BOS: $\beta$ CD complex (0.625 mg/mL)

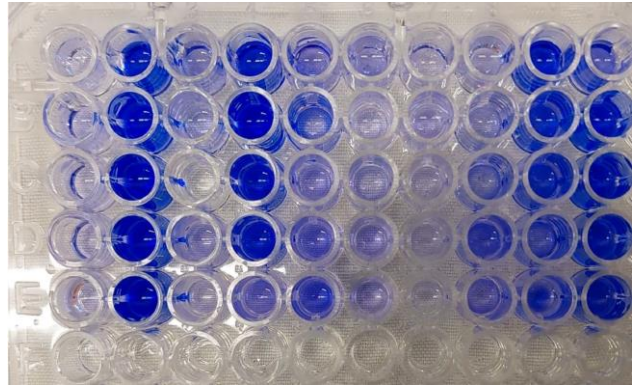

**Figure S7II.** Assay of Biofilm formation prevention against *P. putida*.

Supplementary Figure S7III.

**Biofilm formation prevention-  
*E. coli***

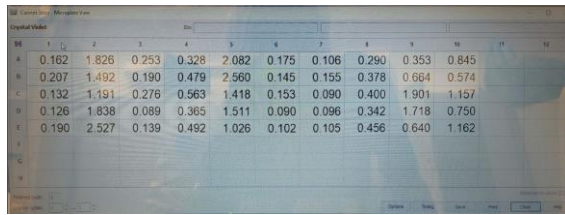

|   | 1     | 2     | 3     | 4     | 5     | 6     | 7     | 8     | 9     | 10    | 11 | 12 |
|---|-------|-------|-------|-------|-------|-------|-------|-------|-------|-------|----|----|
| A | 0.162 | 1.826 | 0.253 | 0.328 | 2.082 | 0.175 | 0.106 | 0.290 | 0.353 | 0.845 |    |    |
| B | 0.207 | 1.492 | 0.190 | 0.479 | 2.560 | 0.145 | 0.155 | 0.378 | 0.664 | 0.574 |    |    |
| C | 0.132 | 1.191 | 0.276 | 0.563 | 1.418 | 0.153 | 0.090 | 0.400 | 1.901 | 1.157 |    |    |
| D | 0.126 | 1.838 | 0.089 | 0.365 | 1.511 | 0.090 | 0.096 | 0.342 | 1.718 | 0.750 |    |    |
| E | 0.190 | 2.527 | 0.139 | 0.492 | 1.026 | 0.102 | 0.105 | 0.456 | 0.640 | 1.162 |    |    |

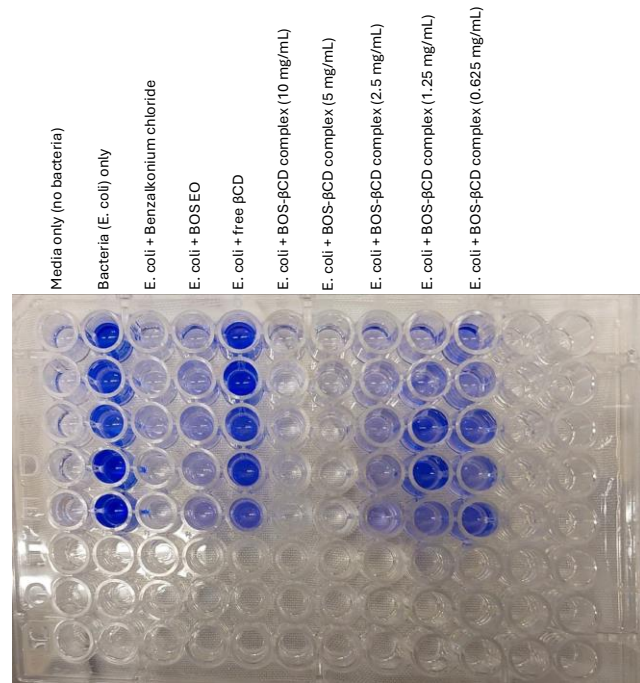

**Figure S7III.** Assay of Biofilm formation prevention against *E. coli*.

Supplementary Figure S7IV.

**Biofilm formation prevention-  
*B. subtilis***

| Well | 1     | 2     | 3     | 4     | 5     | 6     | 7     | 8     | 9     | 10    |
|------|-------|-------|-------|-------|-------|-------|-------|-------|-------|-------|
| 1    | 0.179 | 1.074 | 0.303 | 0.523 | 0.385 | 0.325 | 0.144 | 0.245 | 0.998 | 1.013 |
| 2    | 0.219 | 0.890 | 0.231 | 0.375 | 0.260 | 0.231 | 0.249 | 0.379 | 0.759 | 1.122 |
| 3    | 0.195 | 1.412 | 0.172 | 0.383 | 0.590 | 0.165 | 0.131 | 0.471 | 0.745 | 0.891 |
| 4    | 0.147 | 1.102 | 0.116 | 0.620 | 0.539 | 0.318 | 0.143 | 0.233 | 0.472 | 0.924 |
| 5    | 0.181 | 0.738 | 0.226 | 0.716 | 0.518 | 0.226 | 0.154 | 0.350 | 0.973 | 1.009 |

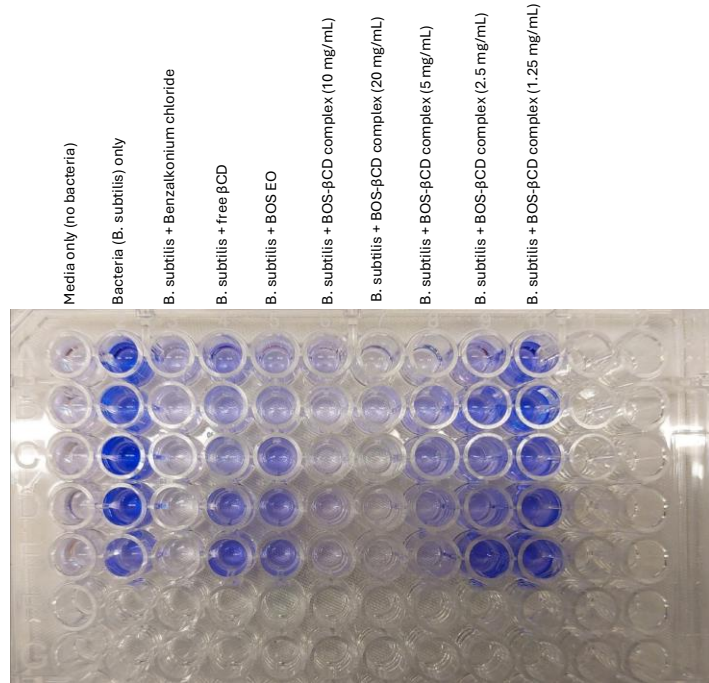

**Figure S7IV.** Assay of Biofilm formation prevention against *B. subtilis*.

Supplementary Figure S8I.

**Biofilm disruption -  
*S. aureus***

| OD | 1     | 2     | 3     | 4     | 5     | 6     | 7     | 8     | 9     | 10    |
|----|-------|-------|-------|-------|-------|-------|-------|-------|-------|-------|
| A  | 0.070 | 0.825 | 0.172 | 0.278 | 0.525 | 0.344 | 0.147 | 0.255 | 0.319 | 0.933 |
| B  | 0.089 | 0.876 | 0.309 | 0.237 | 0.590 | 0.267 | 0.237 | 0.338 | 0.426 | 0.933 |
| C  | 0.094 | 1.003 | 0.169 | 0.242 | 0.881 | 0.355 | 0.143 | 0.344 | 0.537 | 0.706 |
| D  | 0.071 | 1.167 | 0.073 | 0.234 | 0.606 | 0.163 | 0.156 | 0.342 | 0.638 | 1.181 |
| E  | 0.087 | 0.830 | 0.152 | 0.366 | 0.518 | 0.199 | 0.155 | 0.369 | 0.660 | 1.038 |

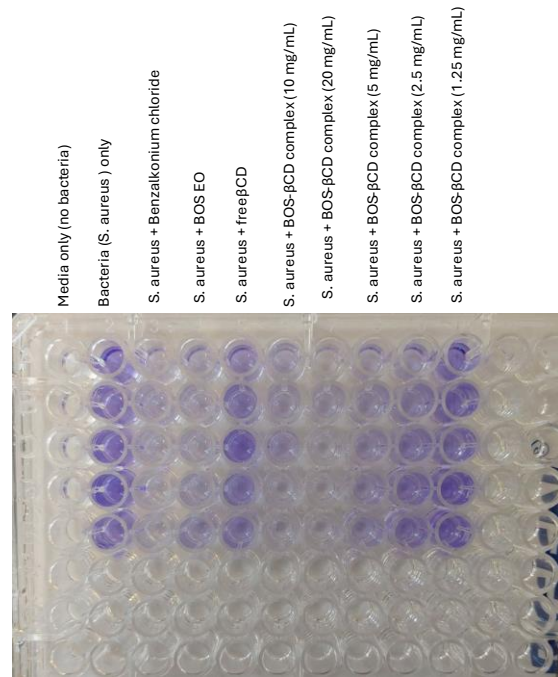

**Figure S8I.** Assay of established biofilm disruption against *S. aureus*.

Supplementary Figure S8II.

**Biofilm disruption -  
*P. Putida***

|   | 1     | 2     | 3     | 4     | 5     | 6     | 7     | 8     | 9     | 10    |
|---|-------|-------|-------|-------|-------|-------|-------|-------|-------|-------|
| A | 0.079 | 1.605 | 0.234 | 0.430 | 0.490 | 0.238 | 0.387 | 0.371 | 0.537 | 0.786 |
| B | 0.077 | 1.030 | 0.254 | 0.426 | 0.558 | 0.269 | 0.358 | 0.357 | 0.622 | 1.194 |
| C | 0.042 | 0.870 | 0.278 | 0.355 | 0.579 | 0.272 | 0.442 | 0.478 | 0.856 | 0.928 |
| D | 0.082 | 1.396 | 0.269 | 0.386 | 0.639 | 0.247 | 0.334 | 0.504 | 0.719 | 1.689 |
| E | 0.095 | 0.970 | 0.301 | 0.269 | 0.649 | 0.230 | 0.278 | 0.530 | 0.785 | 1.898 |

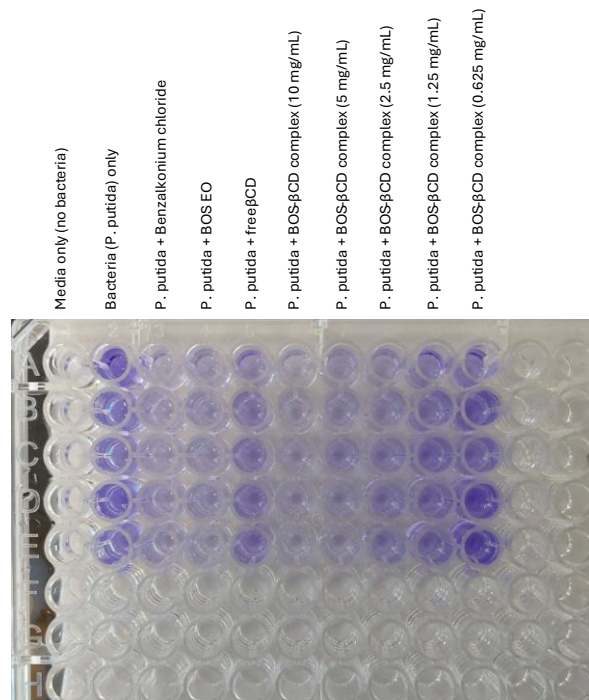

**Figure S8II.** Assay of established biofilm disruption against *P. putida*.

Supplementary Figure S8III.

**Biofilm disruption -  
*E. coli***

|       | 1     | 2     | 3     | 4     | 5     | 6     | 7     | 8     | 9     | 10 |
|-------|-------|-------|-------|-------|-------|-------|-------|-------|-------|----|
| 0.291 | 0.834 | 0.284 | 0.466 | 1.320 | 0.325 | 0.268 | 0.496 | 0.338 | 0.782 |    |
| 0.127 | 1.155 | 0.377 | 0.371 | 0.560 | 0.344 | 0.410 | 0.524 | 0.402 | 0.719 |    |
| 0.114 | 1.094 | 0.199 | 0.311 | 0.635 | 0.331 | 0.233 | 0.611 | 0.636 | 0.606 |    |
| 0.100 | 1.366 | 0.305 | 0.320 | 0.750 | 0.322 | 0.356 | 0.484 | 0.593 | 0.484 |    |
| 0.250 | 1.593 | 0.173 | 0.227 | 0.804 | 0.217 | 0.329 | 0.414 | 0.449 | 0.728 |    |

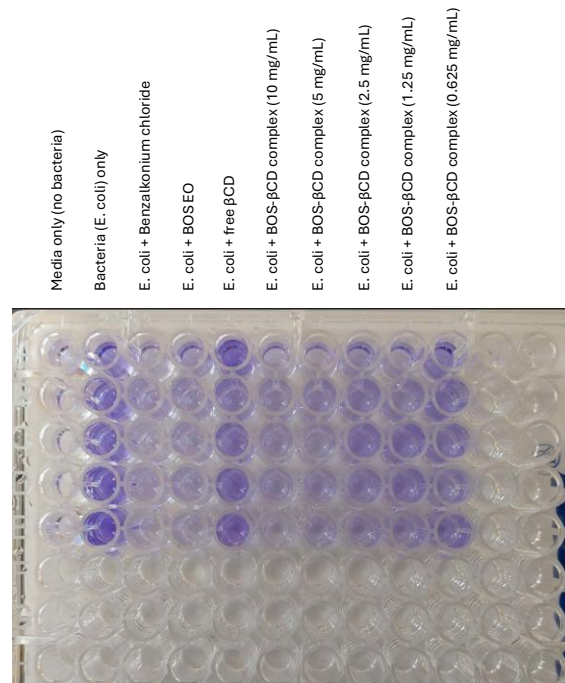

**Figure S8III.** Assay of established biofilm disruption against *E. coli*.



Supplementary Figure S8IV.

**Biofilm disruption -  
*B. subtilis***

|   | 1     | 2     | 3     | 4     | 5     | 6     | 7     | 8     | 9     | 10    |
|---|-------|-------|-------|-------|-------|-------|-------|-------|-------|-------|
| A | 0.137 | 0.963 | 0.215 | 0.290 | 0.920 | 0.514 | 0.175 | 0.242 | 0.674 | 0.972 |
| B | 0.135 | 0.934 | 0.335 | 0.188 | 0.714 | 0.213 | 0.184 | 0.254 | 0.367 | 1.017 |
| C | 0.059 | 0.831 | 0.147 | 0.381 | 0.805 | 0.177 | 0.191 | 0.201 | 0.496 | 1.214 |
| D | 0.071 | 0.944 | 0.148 | 0.280 | 0.870 | 0.233 | 0.275 | 0.233 | 0.388 | 0.995 |
| E | 0.121 | 0.723 | 0.161 | 0.282 | 0.792 | 0.247 | 0.295 | 0.203 | 0.808 | 0.809 |

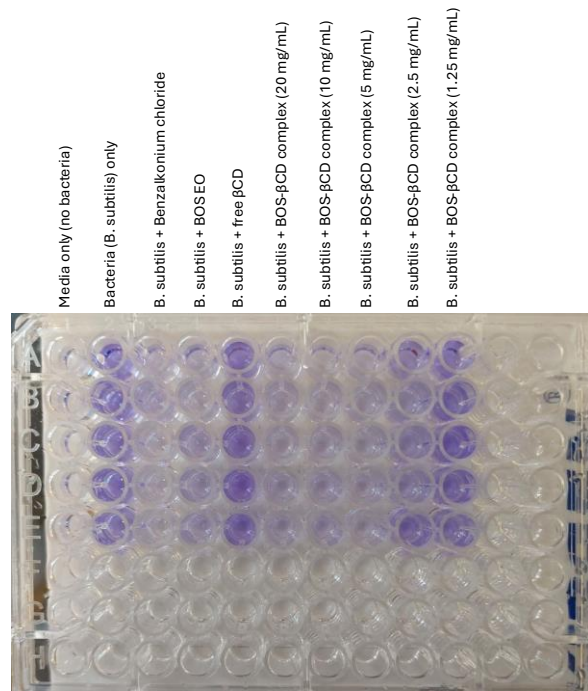

**Figure S8IV.** Assay of established biofilm disruption against *B. subtilis*.
